# Supplementary material for: Removing the needle from the haystack: Enrichment of Wolbachia endosymbiont transcripts from host nematode RNA by Cappable-seq™
Source: PLoS One. 2017 Mar 14;12(3):e0173186. doi: 10.1371/journal.pone.0173186 (PMC5349465; doi:10.1371/journal.pone.0173186)
Supplement: S3 Table — (XLSX) [file pone.0173186.s003.xlsx]

## Sheet: Table S2
Wolbachia Transcript Quantitation from Capped and Total RNA from B. malayi Microfilariae
Transcript	Capped RNA (FPKM)	Total RNA (FPKM)	Fold Change Capped/Total (<1=depleted, >1=enriched)	Annotation
ribH|gene219	0	0	0	Riboflavin synthase beta-chain
Wbm0091|gene102	0	0	0	hypothetical protein
Wbm0093|gene104	0	0	0	Peptidyl-tRNA hydrolase
Wbm0187|gene217	0	0	0	Predicted aspartyl protease
Wbm0188|gene218	0	0	0	Preprotein translocase subunit YidC
Wbm0208|gene243	0	0	0	Predicted membrane protein
Wbm0270|gene310	0	0	0	hypothetical protein
Wbm0305|gene350	0	0	0	Ribonuclease HI
Wbm0390|gene443	0	0	0	Multisubunit Na+/H+ antiporter, MnhB subunit
Wbm0447|gene512	0	0	0	Ankyrin repeat-containing protein and possible domain WF-3
Wbm0456|gene521	0	0	0	cytochrome c oxidase assembly protein subunit 15
Wbm0476|gene546	0	0	0	tRNA processing exoribonuclease BN
Wbm0479|gene549	0	0	0	hypothetical protein
Wbm0660|gene762	0	0	0	Predicted transcriptional regulator
Wbm5001|gene2	0	0	0	Molecular chaperone, SugES homolog (pseudogene region)
Wbm0482|gene552	0	5.93723	0	predicted protein
Wbm0714|gene836	0	6.14189	0	protein kinase, AarF
Wbm0430|gene492	0	10.1952	0	Uncharacterized homolog of invasion-associated protein B
Wbm0792|gene920	0	15.2158	0	Uncharacterized protein
acpS|gene89	0	15.4276	0	Phosphopantetheinyl transferase (holo-ACP synthase)
Wbm0425|gene487	0	19.8146	0	Phosphatidylserine synthase
Wbm0758|gene883	0	22.7415	0	DnaJ-domain-containing protein
Wbm0391|gene444	0	31.0879	0	Multisubunit Na+/H+ antiporter, MnhB subunit
rpsR|gene573	0	35.0563	0	Ribosomal protein S18
rplS|gene265	0	45.7514	0	Ribosomal protein L19
tsf|gene936	0	55.313	0	Elongation Factor Ts
rplX|gene375	0	85.5464	0	Ribosomal protein L24
Wbm0240|gene276	0	115.362	0	HIT family hydrolase
Wbm7032|rna34	0	3625.44	0	tRNA-Gln
Wbm7011|rna10	0	3691.74	0	tRNA-Asn
Wbm7015|rna15	0	6880.36	0	tRNA-Met
Wbm7019|rna19	318.165	2930.03	0.108588	tRNA-Thr
Wbm9001|rna29	41931.4	197753	0.212039	23S ribosomal RNA
Wbm9003|rna14	54533.2	223858	0.243606	16S ribosomal RNA
Wbm7017|rna17	2152.17	6113.92	0.352011	tRNA-Leu
Wbm9002|rna28	40277.8	58875.8	0.684115	5S ribosomal RNA
Wbm7013|rna12	14814.7	18332.8	0.808098	tRNA Thr
Wbm7034|rna36	8618.06	10624.8	0.811127	tRNA-Asp
Wbm0163|gene190	36.4236	42.7781	0.851454	Uncharacterized protein
Wbm7026|rna26	2133.74	2400.11	0.889018	tRNA-Leu
Wbm5012|gene112	266.3	235.429	1.13113	cardiolipin synthase family enzyme (pseudogene region)
Wbm7008|rna7	15803.5	12344.5	1.28021	tRNA-Leu
Wbm0149|gene176	277.519	216.221	1.2835	hypothetical protein
Wbm0784|gene912	246.844	140.55	1.75627	predicted protein
Wbm0769|gene895	71.6283	35.1808	2.03601	Membrane protease subunit, stomatin/prohibitin homolog
Wbm5096|gene910	34.875	16.4729	2.11711	pseudogene
cysS|gene789	28.8379	13.3345	2.16265	Cysteinyl-tRNA synthetase
pyrE|gene918	34.3229	15.7019	2.18591	Orotate phosphoribosyltransferase
rpsS|gene382	649.317	264.741	2.45265	Ribosomal protein L2
Wbm0503|gene575	64.1107	25.2698	2.53705	Adenylosuccinate lyase
groEL|gene395	374.982	146.302	2.56307	Chaperonin GroEL (HSP60 family)
Wbm0105|gene122	201.696	72.6832	2.775	hypothetical protein
rplI|gene574	166.35	58.0516	2.86555	Ribosomal protein L9
Wbm5081|gene773	42.9022	14.7768	2.90335	pseudogene
Wbm5029|gene231	176.045	59.463	2.96058	Predicted aminoglycoside phosphotransferase (pseudogene region)
Wbm0676|gene783	121.577	40.7866	2.98081	Glutaredoxin-related protein
Wbm0630|gene729	151.99	50.959	2.98259	Leucyl aminopeptidase
Wbm0706|gene821	58.2474	19.4452	2.99546	Inactivated homolog of predicted Zn-dependent protease, PmbA
Wbm0025|gene31	42.7469	14.1613	3.01857	Deoxyguanosinetriphosphate triphosphohydrolase-like protein
Wbm0244|gene280	111.701	36.3708	3.07117	Malate dehydrogenase
Wbm0576|gene662	52.0281	16.1066	3.23023	predicted protein
Wbm0218|gene254	287.791	83.502	3.44652	hypothetical protein
Wbm0079|gene90	143.679	41.1299	3.4933	prolipoprotein diacylglyceryl transferase
Wbm0486|gene557	67.5353	19.2858	3.50181	Succinate dehydrogenase subunit C sdhC
alaS|gene408	48.8164	13.8132	3.53404	Alanyl-tRNA synthetase
rpsE|gene369	109.665	30.1787	3.63385	30S ribosomal protein S5
Wbm0151|gene178	158.354	43.0947	3.67456	Predicted ATPase of the PP-loop superfamily implicated in cell cycle control, MesJ
Wbm0577|gene664	26.0519	6.99151	3.72622	23S rRNA methylase
rnhB|gene741	59.7795	15.987	3.73926	Ribonuclease HII
Wbm5041|gene398	222.99	59.463	3.75006	Unchracterized conserved protein (pseudogene region)
infB|gene614	72.0998	18.9724	3.80025	Translation initiation factor 2, IF-2, GTPase
rplE|gene374	107.347	27.6144	3.88736	Ribosomal protein L5
mnmA|gene182	110.706	28.1339	3.93497	Predicted tRNA(5-methylaminomethyl-2-thiouridylate) methyltransferase, contain the PP-loop ATPase domain
Wbm0419|gene480	26.9482	6.8225	3.9499	Zn-dependent peptidase
Wbm0307|gene352	243.575	61.501	3.9605	Cytochrome c oxidase, subunit 1
Wbm0146|gene172	106.441	26.7716	3.97589	Kef-type K+ transport system, membrane component
Wbm0770|gene896	46.3636	11.4826	4.03773	Trypsin-like serine protease
Wbm0687|gene797	200.681	48.2786	4.15673	hypothetical protein
Wbm0540|gene618	101.187	24.2698	4.16926	Aconitase A
Wbm0414|gene475	103.059	24.6164	4.1866	hypothetical protein
rpsC|gene380	89.2096	20.2679	4.40152	Ribosomal protein S3
Wbm5062|gene590	98.3007	22.1994	4.42808	Predicted metal-binding protein (pseudogene region)
Wbm0462|gene528	109.431	24.0347	4.55304	tRNA-dihydrouridine synthase
Wbm0614|gene712	221.256	48.4	4.5714	3-oxoacyl-[acyl-carrier-protein] synthase III
Wbm0727|gene849	101.055	21.7738	4.64113	Predicted Zn-dependent protease, TldD ortholog
Wbm0593|gene686	32.5194	6.87816	4.72792	Queuine/archaeosine tRNA-ribosyltransferase
Wbm0759|gene884	84.4306	17.6865	4.77373	Molecular chaperone, DnaK
Wbm0072|gene83	91.3776	18.639	4.90249	3-polyprenyl-4-hydroxybenzoate decarboxylase
Wbm0019|gene24	161.853	32.5	4.98009	Polyribonucleotide nucleotidyltransferase, pnp
Wbm7016|rna16	18215.9	3640.69	5.00342	tRNA-Pro
clpP|gene635	133.107	26.5509	5.01328	Protease subunit of ATP-dependent Clp protease
Wbm0026|gene32	38.5367	7.63139	5.04976	Pyrimidine deaminase and reductase
Wbm0652|gene751	182.188	35.4904	5.13344	Transcription antiterminator
clpX|gene634	70.5038	13.7315	5.13446	ATP-dependent protease Clp, ATPase subunit
Wbm0424|gene485	342.739	62.8804	5.45065	Na+/alanine symporter
Wbm5085|gene792	171.894	31.4954	5.45775	N-acetyl-anhydromuramyl-L-alanine amidase (pseudogene region)
Wbm0221|gene257	192.537	35.0797	5.48856	Zn-dependent peptidase
rplV|gene381	110.261	19.5787	5.63168	Ribosomal protein L22
Wbm5052|gene486	822.321	143.675	5.72348	Na+/alanine symporter (pseudogene region)
rplJ|gene748	289.224	50.3089	5.74896	Ribosomal protein L10
Wbm0063|gene73	129.955	21.8957	5.93518	ATPase involved in chromosome partitioning
Wbm0699|gene812	135.787	22.8744	5.9362	S-adenosylmethionine synthetase
prfA|gene405	45.9285	7.70951	5.95738	Protein chain release factor A
Wbm0669|gene776	146.387	24.5574	5.96101	hypothetical protein
Wbm0743|gene867	649.085	108.434	5.98599	hypothetical protein
thrS|gene539	65.7809	10.7097	6.14218	Threonyl-tRNA synthetase
Wbm0708|gene823	1743.08	282.595	6.16812	Superfamily II DNA/RNA helicase
Wbm0376|gene424	131.838	21.0555	6.26145	NADH:ubiquinone oxidoreductase chain G
Wbm0693|gene803	56788	8873.82	6.3995	hypothetical protein
Wbm0739|gene863	67.0719	10.4506	6.418	3-oxoacyl-(acyl-carrier-protein) synthase
Wbm0670|gene777	82.4882	12.69	6.50025	Uncharacterized conserved protein, YebC family
dapD|gene514	141.791	21.6786	6.5406	Tetrahydrodipicolinate N-succinyltransferase
pyrH|gene935	305.376	46.6195	6.55039	Uridylate kinase
Wbm0297|gene339	224.538	32.7785	6.85016	Type IV secretory pathway, component VirB8
Wbm0106|gene124	108.605	15.8353	6.85841	hypothetical protein
Wbm0561|gene644	62.421	8.96097	6.96588	Dihydrolipoamide dehydrogenase E3 component
thyX|gene865	38.4133	5.37171	7.15104	Predicted alternative thymidylate synthase
Wbm0057|gene66	172.827	24.0311	7.19181	Uncharacterized protein conserved in bacteria
Wbm0656|gene758	117.11	16.0381	7.30199	Methionyl-tRNA formyltransferase
Wbm0243|gene279	178.493	24.129	7.39745	NADH:ubiquinone oxidoreductase chain C
Wbm0388|gene441	3988.58	537.375	7.42234	hypothetical protein
Wbm0296|gene338	206.662	27.4773	7.52119	Ankyrin repeat-containing protein
Wbm0010|gene11	925.331	119.219	7.76161	Probable outer membrane protein
Wbm0411|gene471	154.906	19.9057	7.78199	AICAR transformylase/IMP cyclohydrolase PurH
Wbm5069|gene652	72.6485	9.1842	7.91016	sn-glycerol-1-phosphate dehydrogenase (pseudogene region)
Wbm0037|gene45	52.8686	6.66447	7.9329	Topoisomerase IA, TopA
tuf|gene388	502.038	63.0123	7.9673	Translation elongation factor EF-Tu, GTPase
rplO|gene368	93.7738	11.7298	7.99449	Ribosomal protein L15
Wbm0621|gene719	63.9945	7.88885	8.11202	NADH:ubiquinone oxidoreductase chain N
Wbm0014|gene18	135.629	16.6375	8.15201	ABC-type transport system involved in cytochrome c biogenesis, ATPase component
Wbm0109|gene129	122.333	14.9631	8.17565	hypothetical protein
Wbm0179|gene209	168.059	20.4294	8.22633	1-deoxy-D-xylulose 5-phosphate reductoisomerase
Wbm0029|gene35	368.034	44.4117	8.28687	hypothetical protein
Wbm0433|gene495	1176.07	141.536	8.30933	Uncharacterized protein conserved in bacteria, YbaB family
Wbm0562|gene645	75.0563	8.94352	8.39225	Integrase
Wbm0230|gene266	513.243	61.0393	8.4084	hypothetical protein
Wbm0262|gene301	138.906	16.5033	8.41686	hypothetical protein
Wbm0145|gene171	91.9687	10.8173	8.502	SurF1 family protein
Wbm0536|gene613	147.271	17.1568	8.58383	Ribosome-binding factor A
Wbm0754|gene878	531.473	61.8881	8.58764	Cytochrome B561
tuf|gene753	505.911	58.3669	8.66777	Translation elongation factor EF-Tu, GTPase
Wbm0774|gene900	601.461	69.2249	8.68851	Cytochrome c1
Wbm0599|gene693	67.8737	7.75134	8.75638	Probably membrane associated protein containing PAS/PAC domain
Wbm0021|gene27	88.6497	10.0919	8.78424	Cysteine sulfinate desulfinase/cysteine desulfurase
Wbm0469|gene536	87.2169	9.90214	8.80788	Predicted hydrolase of the metallo-beta-lactamase superfamily
Wbm0771|gene897	899.949	101.671	8.85158	hypothetical protein
Wbm0073|gene84	188.694	21.1037	8.94128	5,10-methylene-tetrahydrofolate dehydrogenase/Methenyl tetrahydrofolate cyclohydrolase
Wbm0742|gene866	33.5496	3.74666	8.95454	Probable extracellular metallopeptidase
Wbm0028|gene34	671.888	74.1065	9.06652	Cysteine sulfinate desulfinase/cysteine desulfurase
Wbm0389|gene442	934.634	102.509	9.11758	Multisubunit Na+/H+ antiporter, MnhG subunit
recF|gene151	81.4965	8.88926	9.16797	Recombinational DNA repair ATPase, RecF
Wbm0122|gene144	174.438	18.7633	9.29677	Uncharacterized membrane protein, virulence factor MviN
Wbm0498|gene570	501.506	53.8127	9.31947	Predicted transcriptional regulator, XRE family
Wbm0442|gene506	243.976	25.9451	9.40355	Membrane protein TerC, possibly involved in tellurium resistance
Wbm0394|gene447	244.292	25.7061	9.50327	Ankyrin repeat-containing protein
Wbm0088|gene99	61.1988	6.4077	9.55082	N-acetylglucosamine-1-phosphate uridyltransferase, contains nucleotidyltransferase and I-patch acetyltransferase domains
Wbm0416|gene477	194.264	20.0575	9.68535	FAD synthase
Wbm0013|gene17	778.746	80.255	9.7034	hypothetical protein
Wbm0198|gene229	225.793	23.2012	9.73195	hypothetical protein
Wbm0061|gene71	110.15	11.3049	9.74356	Predicted membrane GTPase involved in stress response
Wbm0242|gene278	673.337	68.3011	9.85836	NADH:ubiquinone oxidoreductase chain B
Wbm0248|gene284	170.428	17.1721	9.9247	Tyrosyl-tRNA synthetase
Wbm0352|gene399	155.664	15.67	9.93389	Probable outer membrane protein
Wbm0303|gene347	243.467	24.3925	9.98122	Lipoate synthase
Wbm0101|gene118	108.995	10.7331	10.155	2-methylthioadenine synthetase
Wbm0310|gene355	126.766	12.3896	10.2316	Short-chain alcohol dehydrogenase family enzyme
Wbm5086|gene811	103.579	9.96115	10.3983	Transcriptional activator, tenA (pseudogene region)
Wbm0373|gene421	130.3	12.4588	10.4585	Delta-aminolevulinic acid dehydratase
Wbm0588|gene676	278.753	26.4171	10.552	Acetyl-CoA carboxylase, carboxyltransferase component
Wbm0772|gene898	83.4193	7.88231	10.5831	hypothetical protein
Wbm0762|gene887	58.4933	5.518	10.6005	Predicted permease
fumC|gene578	125.494	11.8378	10.6011	Fumarase
hisS|gene472	73.2084	6.86163	10.6692	Histidyl-tRNA synthetase
Wbm0314|gene359	371.11	34.7486	10.6799	F0F1-type ATP synthase, alpha subunit
Wbm0375|gene423	357.306	33.2533	10.745	NADH:ubiquinone oxidoreductase chain H
obgE|gene142	87.5988	8.12425	10.7824	Predicted GTPase
Wbm0584|gene672	121.474	11.1532	10.8914	Ubiquinone biosynthesis protein COQ7
Wbm5008|gene55	79.156	7.25358	10.9127	cell division protein FtsI (pseudogene region)
Wbm0484|gene555	182.104	16.6284	10.9514	hypothetical protein
Wbm0765|gene890	410.481	37.4127	10.9717	hypothetical protein
Wbm0779|gene906	383.061	34.7909	11.0104	hypothetical protein
Wbm0274|gene314	1111.19	97.9459	11.3449	hypothetical protein
Wbm5026|gene196	146.362	12.893	11.3521	Unchracterized conserved protein (pseudogene region)
Wbm0102|gene119	424.25	37.2452	11.3907	Asp-tRNAAsn/Glu-tRNAGln amidotransferase C subunit
leuS|gene701	102.407	8.90488	11.5001	Leucyl-tRNA synthetase
Wbm0362|gene409	421.847	36.4836	11.5626	Predicted membrane protein
truA|gene490	80.223	6.90898	11.6114	Pseudouridylate synthase (tRNA psi55)
Wbm0245|gene281	149.694	12.8919	11.6115	Mg-dependent Dnase, TadD
Wbm0587|gene675	1073.06	92.3755	11.6163	hypothetical protein
Wbm0452|gene517	89.2972	7.68221	11.6239	Predicted SAM-dependent methyltransferase
Wbm0551|gene633	73.0705	6.25295	11.6858	ATP-dependent Lon protease
Wbm0175|gene204	83.9491	7.17737	11.6964	ABC-type Mn2+/Zn2+ transport system, permease component
Wbm5020|gene138	458.317	39.1732	11.6998	Predicted ATPase, AAA+ superfamily (pseudogene region)
rpsA|gene68	204.001	17.422	11.7094	Ribosomal protein S1
Wbm0227|gene263	238.696	20.331	11.7405	Phosphoribosylaminoimidazolesuccinocarboxamide (SAICAR) synthase
secD|gene916	70.2686	5.95155	11.8068	Preprotein translocase subunit SecD
engA|gene674	103.491	8.75629	11.819	Predicted GTPase
ileS|gene410	98.922	8.34479	11.8543	Isoleucyl-tRNA synthetase
trmE|gene38	150.893	12.7087	11.8732	Predicted GTPase
lysK|gene927	192.877	16.1478	11.9445	Lysyl-tRNA synthetase class I
rpmA|gene814	2166.65	178.311	12.151	Ribosomal protein L27
Wbm0804|gene933	628.309	51.6916	12.155	Undecaprenyl pyrophosphate synthase
ubiA|gene612	70.6628	5.78066	12.224	4-hydroxybenzoate polyprenyltransferase
Wbm0351|gene396	131.388	10.741	12.2324	Uncharacterized protein predicted to be involved in C-type cytochrome biogenesis
Wbm0578|gene665	312.952	25.56	12.2438	ABC-type transport system involved in cytochrome c biogenesis, permease component
Wbm0544|gene622	296.738	23.7944	12.4709	Uncharacterized protein of SCO1/SenC/PrrC family, involved in biogenesis of respiratory system
Wbm0550|gene632	1071.03	85.8304	12.4784	hypothetical protein
Wbm0750|gene874	64.3337	5.14729	12.4986	Type IV secretory pathway, VirB4 components
Wbm0371|gene418	49.2444	3.90541	12.6093	Glycyl-tRNA synthetase, beta subunit
Wbm5034|gene293	194.45	15.3948	12.6309	2-polyprenylphenol hydroxylase family enzyme (pseudogene region)
Wbm0543|gene621	95.502	7.54148	12.6636	DNA polymerase III epsilon subunit
Wbm0103|gene120	183.998	14.4876	12.7004	Phosphoribosylpyrophosphate synthetase
Wbm0646|gene745	717.582	55.5193	12.9249	Uncharacterized protein conserved in bacteria
Wbm0554|gene636	365.207	28.1602	12.9689	FKBP-type peptidyl-prolyl cis-trans isomerase, tig
Wbm0293|gene335	101.892	7.84373	12.9902	ABC-type phosphate transport system, periplasmic component
rplK|gene750	569.363	43.8251	12.9917	Ribosomal protein L11
Wbm0519|gene594	138.35	10.6435	12.9985	Succinyl-CoA synthetase, alpha subunit
Wbm0261|gene300	455.494	34.9565	13.0303	hypothetical protein
recO|gene329	103.915	7.93257	13.0998	Recombinational DNA repair protein RecO
Wbm0273|gene313	294.996	22.3875	13.1768	Adenylosuccinate synthase
carB|gene586	126.044	9.54901	13.1997	Carbamoylphosphate synthase large subunit
Wbm0121|gene143	61.629	4.6598	13.2257	Uncharacterized protein involved in outer membrane biogenesis
Wbm0285|gene326	65.6948	4.94676	13.2804	Methylase of polypeptide chain release factor
Wbm0172|gene201	114.43	8.60847	13.2927	ATP-dependent exoDNAse (exonuclease V) beta subunit, RecB
Wbm0182|gene212	81.1192	6.1019	13.2941	NAD-specific glutamate dehydrogenase
Wbm5036|gene305	304.229	22.7015	13.4013	Transposase IS4 family (pseudogene region)
Wbm0023|gene29	1052.03	77.7636	13.5286	ABC-type antimicrobial peptide transport system, ATPase component
Wbm0150|gene177	284.886	20.9194	13.6183	ATP-dependent Zn protease, HflB
Wbm5089|gene828	83.153	6.09709	13.6381	ATPases involved in chromosome partitioning, parA (pseudogene region)
Wbm0280|gene321	71.2265	5.14957	13.8315	Type IV secretory pathway, component VirB9
Wbm0565|gene648	628.215	45.2991	13.8682	hypothetical protein
Wbm0033|gene41	1229.8	88.4968	13.8965	hypothetical protein
Wbm0664|gene768	97.7318	7.01417	13.9335	Transketolase
Wbm5037|gene334	79.8998	5.72803	13.9489	Potassium uptake protein TrkH (pseudogene region)
Wbm0635|gene734	60.4515	4.31713	14.0027	RecG-like helicase
Wbm0418|gene479	86.9834	6.19506	14.0408	Zn-dependent peptidase
Wbm0725|gene847	69.8681	4.941	14.1405	DNA polymerase I, PolA
Wbm0294|gene336	83.5135	5.90558	14.1415	Mg/Co/Ni transporter MgtE
Wbm0800|gene928	118.735	8.37738	14.1733	Protein containing predicted glutamine amidotransferase domain
Wbm0304|gene349	149.179	10.507	14.1981	Probable outer membrane protein
Wbm0738|gene862	1595.78	111.105	14.3628	Acyl carrier protein
Wbm0258|gene297	239.8	16.4317	14.5937	Ribonuclease D
Wbm0202|gene235	397.103	26.8617	14.7832	Methylase involved in ubiquinone/menaquinone biosynthesis
Wbm0429|gene491	231.593	15.5284	14.9142	DNA polymerase III beta clamp subunit
Wbm0167|gene195	515.826	34.2709	15.0514	Permease of the major facilitator superfamily
dnaA|gene316	320.14	21.2521	15.0639	ATPase involved in DNA replication initiation, DnaA
Wbm0493|gene565	264.58	17.4879	15.1293	Cystathionine beta-lyase
Wbm5045|gene433	224.669	14.7726	15.2085	Unchracterized conserved protein (pseudogene region)
Wbm0222|gene258	578.064	37.9545	15.2304	Preprotein translocase subunit YajC
hslU|gene845	125.744	8.23726	15.2653	ATP-dependent protease HslU, ATPase subunit
Wbm0263|gene302	418.259	27.3764	15.2781	Excinuclease ATPase subunit, UvrA
Wbm0082|gene93	162.531	10.631	15.2884	Uncharacterized membrane protein, required for colicin V production, CvpA
Wbm0257|gene296	740.521	48.366	15.3108	Mismatch repair ATPase, MutS family
Wbm0316|gene361	242.264	15.7127	15.4184	RecB family endonuclease
sucC|gene595	345.551	22.34	15.4678	Succinyl-CoA synthetase, beta subunit
Wbm0216|gene252	45.5188	2.94168	15.4737	ABC-type protease secretion system, ATPase and permease component, AprD
Wbm0582|gene669	124.355	7.99675	15.5507	Ankyrin repeat-containing protein
ksgA|gene464	306.531	19.6835	15.573	Dimethyladenosine transferase
Wbm0193|gene223	127.597	8.18611	15.587	hypothetical protein
Wbm0654|gene756	552.751	35.2034	15.7016	Carbamoylphosphate synthase small subunit
def|gene135	305.081	19.2761	15.8269	N-formylmethionyl-tRNA deformylase
Wbm0118|gene140	149.288	9.39747	15.886	UDP-N-acetylmuramate-alanine ligase
Wbm0405|gene462	479.523	30.1598	15.8994	DNA gyrase, topoisomerase II A subunit, GyrA
Wbm0481|gene551	68.4791	4.30548	15.9051	Membrane-bound protoheme IX biogenesis protein, HemY
aspS|gene16	203.808	12.7691	15.961	Aspartyl-tRNA synthetase
Wbm0075|gene86	81.8379	5.12358	15.9728	Cell division protein FtsI
Wbm0735|gene859	59.2377	3.63529	16.2952	Citrate synthase
Wbm0180|gene210	5357.05	328.356	16.3148	hypothetical protein
Wbm5095|gene903	68.1075	4.16693	16.3448	Inactivated transposase (pseudogene region)
Wbm0176|gene205	220.075	13.4624	16.3474	DNA polymerase III delta subunit
frr|gene934	403.019	24.2388	16.627	Ribosome recycling factor
Wbm0795|gene923	92.3945	5.54524	16.6619	Type IV secretory pathway, VirB6 components
Wbm0439|gene501	59096.8	3522.54	16.7768	Oligoketide cyclase/lipid transport protein
rplN|gene376	2877.93	171.457	16.7851	Ribosomal protein L14
Wbm0508|gene582	87.7237	5.21889	16.8089	UDP-N-acetylmuramoylalanine-D-glutamate ligase
dnaK|gene567	2052.2	121.53	16.8864	Molecular chaperone, DnaK
gltX|gene509	52.4527	3.09048	16.9723	Glutamyl- and glutaminyl-tRNA synthetase
Wbm0458|gene524	1129.73	66.5463	16.9766	F0F1-type ATP synthase, subunit b
uvrC|gene419	41.7137	2.45536	16.9888	Nuclease subunit of the excinuclease complex, UvrC
Wbm0809|gene939	100.402	5.90726	16.9964	Protein containing predicted glutamine amidotransferase domain
Wbm0365|gene412	254.383	14.944	17.0224	Predicted EndoIII-related endonuclease
Wbm5041.1|gene401	714.481	41.3058	17.2974	Phospholipase of GDSL family (pseudogene region)
murB|gene905	531.357	30.6762	17.3215	UDP-N-acetylmuramate dehydrogenase
mraY|gene742	209.533	11.946	17.54	UDP-N-acetylmuramyl pentapeptide phosphotransferase
Wbm0689|gene799	918.601	52.2801	17.5708	F0F1-type ATP synthase, beta subunit
Wbm0306|gene351	731.252	41.4077	17.6598	Polyprenyltransferase (cytochrome oxidase assembly factor)
Wbm0438|gene500	521.807	29.5263	17.6726	Protein-disulfide isomerase
Wbm0644|gene743	74.5091	4.19365	17.7671	DNA segregation ATPase FtsK
Wbm0207|gene242	147.931	8.24742	17.9366	Pyruvate/2-oxoglutarate dehydrogenase complex, dehydrogenase E1 component, eukaryotic type, alpha subunit
Wbm0231|gene267	139.17	7.72523	18.015	ABC-type phosphate transport system, permease component
secA|gene306	51.8997	2.87736	18.0373	Preprotein translocase subunit SecA
Wbm0318|gene363	295.957	16.3235	18.1307	DNA-directed RNA polymerase alpha subunit/40 kD subunit, RpoA
Wbm0409|gene467	64.3454	3.50835	18.3406	2C-methyl-D-erythritol 2,4-cyclodiphosphate synthase
Wbm0566|gene649	231.913	12.6444	18.3412	Thioredoxin reductase
pyrG|gene198	92.3831	5.01215	18.4318	CTP synthase
Wbm0191|gene221	690.368	37.3952	18.4614	Translation initiation factor 1, IF-1
Wbm0237|gene273	382.932	20.6516	18.5425	Nucleoside-diphosphate-sugar epimerase
Wbm0591|gene684	713.35	38.1075	18.7194	Type IV secretory pathway, VirB9 component
Wbm5094|gene879	108.342	5.78582	18.7254	Predicted ATP-dependent serine protease (pseudogene region)
sdhA|gene513	830.338	44.0365	18.8557	Succinate dehydrogenase flavoprotein subunit, SdhA
Wbm0615|gene713	785.984	41.6782	18.8584	Fatty acid/phospholipid biosynthesis enzyme
Wbm0278|gene319	607.634	32.048	18.9601	GTP cyclohydrolase II
Wbm0569|gene654	617.468	32.5634	18.962	Ferredoxin
rplF|gene371	505.61	26.6551	18.9686	50S ribosomal protein L6
Wbm5011|gene109	271.054	14.2888	18.9697	ATP-binding subunit of Clp protease and DnaK/DnaJ chaperones (pseudogene region)
Wbm0417|gene478	453.801	23.9087	18.9806	Lipoprotein signal peptidase
Wbm0209|gene244	305.11	16.0472	19.0133	Phosphoenolpyruvate synthase/pyruvate phosphate dikinase
argD|gene154	204.797	10.7644	19.0254	Ornithine/acetylornithine aminotransferase
Wbm0496|gene568	378.502	19.6815	19.2314	Ribonucleases G and E
Wbm0473|gene540	1282.63	65.7121	19.5189	Translation initiation factor 3, IF-3
Wbm0729|gene853	205.43	10.4686	19.6234	Exonuclease III
Wbm0181|gene211	609.808	30.8924	19.7397	ATP-binding subunit of Clp protease and DnaK/DnaJ chaperones
rimM|gene155	185.241	9.34321	19.8263	RimM protein, required for 16S rRNA processing
rnc|gene115	246.317	12.3988	19.8662	dsRNA-specific ribonuclease
gidA|gene709	85.6648	4.29342	19.9526	NAD/FAD-utilizing enzyme apparently involved in cell division, GidA
nusA|gene615	553.738	27.3812	20.2233	Transcription elongation factor, NusA
Wbm0555|gene638	179.859	8.84644	20.3312	Predicted lipoprotein, OsmY ortholog
Wbm0641|gene740	294.611	14.4619	20.3715	Type IV secretory pathway, component VirB8
Wbm5040|gene397	303.985	14.8708	20.4417	Phage-related protein (pseudogene region)
ppnK|gene454	236.345	11.53	20.4983	ATP-NAD kinase
Wbm0647|gene746	510.338	24.636	20.7151	DNA-directed RNA polymerase, fusion of beta and beta' subunits. RpoB/RpoC
Wbm0548|gene630	111.406	5.30631	20.995	NAD-dependent DNA ligase, Lig
Wbm0474|gene542	617.088	29.2909	21.0676	NADH:ubiquinone oxidoreductase, NADH-binding, chain F
Wbm0413|gene473	161.145	7.64388	21.0816	NifU family protein containing thioredoxin-like domain
Wbm0666|gene770	957.707	45.3796	21.1044	Pyruvate/2-oxoglutarate dehydrogenase complex, dehydrogenase E1 component, eukaryotic type, beta subunit
Wbm0539|gene617	446.278	20.8125	21.4428	Proline dehydrogenase, P5C dehydrogenase, PutA ortholog
Wbm0008|gene9	559.605	25.6431	21.8228	Predicted 3'-5' exonuclease related to the exonuclease domain of PolB
Wbm5049|gene468	62.0495	2.84171	21.8353	ABC-type multidrug transport system, ATPase and permease components (pseudogene region)
Wbm0460|gene526	717.151	32.817	21.853	F0F1-type ATP synthase, subunit a
Wbm0133|gene158	709.223	32.4015	21.8886	5-aminolevulinate synthase
Wbm0006|gene7	85.7793	3.82922	22.4012	hypothetical protein
Wbm0509|gene583	798.658	35.4068	22.5566	Transcriptional regulator, tetR family
rpsI|gene659	579.387	25.3316	22.8721	Ribosomal protein S12
Wbm0319|gene364	453.369	19.8182	22.8764	30S ribosomal protein S11
Wbm0299|gene342	219.782	9.49426	23.1489	Replicative DNA helicase, DnaB
Wbm0575|gene661	528.036	22.693	23.2687	Outer membrane protein
rpsF|gene572	805.363	34.5626	23.3016	Ribosomal protein S6
Wbm0480|gene550	360.426	15.4478	23.3319	Phosphomannomutase
Wbm0374|gene422	347.05	14.7534	23.5234	hypothetical protein
gatA|gene888	669.336	28.4296	23.5436	Asp-tRNAAsn/Glu-tRNAGln amidotransferase A subunit
rpmB|gene346	1071.99	45.5319	23.5437	Ribosomal protein L28
valS|gene914	510.69	21.583	23.6617	Valyl-tRNA synthetase
Wbm0195|gene225	593.938	24.7664	23.9816	2-polyprenyl-3-methyl-5-hydroxy-6-metoxy-1,4-benzoquinol methylase
eno|gene141	247.509	10.1482	24.3894	Enolase
fusA|gene389	835.483	34.1484	24.4662	Translation elongation factor FusA, GTPase
Wbm0359|gene406	120.045	4.90124	24.4928	Permease of the major facilitator superfamily
Wbm0217|gene253	349.9	14.2267	24.5946	Metal-dependent proteases with possible chaperone activity
Wbm0667|gene771	264.662	10.7585	24.6003	Membrane GTPase LepA
Wbm0603|gene698	2835.14	114.145	24.8381	hypothetical protein
Wbm5083|gene775	793.194	31.9308	24.841	Membrane proteins related to metalloendopeptidase (pseudogene region)
Wbm0194|gene224	120.472	4.84397	24.8705	DNA primase, DnaG
Wbm0077|gene88	241.15	9.69078	24.8845	Prolyl-tRNA synthetase
rpsD|gene767	3531.54	141.793	24.9063	Ribosomal protein S4
Wbm0796|gene924	334.687	13.4328	24.9157	Type IV secretory pathway, VirB6 components
Wbm0491|gene563	276.128	11.0751	24.9323	Cytochrome oxidase assembly factor
Wbm0313|gene358	257.556	10.3092	24.9831	Transcription elongation factor, GreA
rplT|gene759	5832.04	233.094	25.0201	Ribosomal protein L20
Wbm0527|gene604	516.339	20.6226	25.0375	IMP dehydrogenase, GuaB
Wbm0138|gene164	629.248	25.1209	25.0488	Molecular chaperone, HSP90 family, HtpG
Wbm0530|gene607	116.646	4.63548	25.1637	Parvulin-like peptidyl-prolyl isomerase, PPID
mutL|gene450	953.506	37.8397	25.1986	DNA mismatch repair enzyme MutL, predicted ATPase
Wbm0219|gene255	1031.07	40.7966	25.2734	hypothetical protein
Wbm7018|rna18	45378.1	1784.48	25.4293	tRNA-Ser
Wbm5018|gene131	172.144	6.76064	25.4627	Na+/H+-dicarboxylate symporter (pseudogene region)
Wbm0711|gene831	149.922	5.87875	25.5024	DNA recombination protein rmuC homolog
Wbm0736|gene860	326.937	12.7876	25.5667	Secreted or membrane protein containg FKBP-type peptidyl-prolyl cis-trans isomerase domain
Wbm0295|gene337	734.387	28.5017	25.7664	Protein chain release factor B
Wbm0053|gene62	264.571	10.2601	25.7864	Outer membrane protein
sucA|gene448	813.358	31.5071	25.8151	2-oxoglutarate dehydrogenase complex, E1 component
Wbm0284|gene325	141.386	5.46999	25.8476	Outer surface protein Wsp
Wbm0226|gene262	1369.16	52.6791	25.9906	Phosphoribosylaminoimidazole (AIR) synthetase
Wbm0355|gene402	2143.79	82.3541	26.0314	dUTPase
rpsQ|gene377	2840.59	109.114	26.0332	Ribosomal protein S17
Wbm0755|gene880	775.309	29.7384	26.071	Signal recognition particle GTPase
Wbm0022|gene28	1717.3	65.7969	26.1	Alpha/beta superfamily hydrolase
Wbm0393|gene446	211.065	8.08464	26.1069	DNA-directed RNA polymerase sigma 70 subunit, RpoD
secY|gene367	105.641	4.03195	26.201	Preprotein translocase subunit SecY
Wbm0532|gene609	261.141	9.93605	26.2822	Geranylgeranyl pyrophosphate synthase
Wbm0617|gene715	160.567	6.10662	26.2939	ABC-type transport system involved in resistance to organic solvents, permease component
Wbm0465|gene531	1425.72	53.7934	26.5036	Phosphoribosylamine-glycine ligase
Wbm0434|gene496	1356.01	51.0561	26.5592	DNA polymerase III, gamma/tau subunit
Wbm0426|gene488	2135.16	80.389	26.5604	Phosphatidylserine decarboxylase
Wbm0367|gene414	569.159	21.3859	26.6138	Isocitrate/isopropylmalate dehydrogenase, LeuB
Wbm0668|gene772	172.864	6.49212	26.6267	Malonyl-CoA decarboxylase
Wbm5003|gene12	1962.04	73.524	26.6857	Uncharacterized conserved protein (pseudogene region)
Wbm5084|gene784	389.317	14.57	26.7205	HlyD family secretion protein (pseudogene region)
rpsP|gene608	3404.12	127.302	26.7405	Ribosomal protein S16
Wbm0223|gene259	133.381	4.98254	26.7697	Glucosamine 6-phosphate synthetase, contains amidotransferase and phosphosugar isomerase domains
Wbm0457|gene523	566.035	21.0064	26.9458	F0F1-type ATP synthase, subunit b
Wbm0709|gene826	265.461	9.80027	27.0871	Coproporphyrinogen III oxidase
Wbm0506|gene580	128.699	4.6902	27.44	Probable outer membrane protein
rplW|gene384	742.199	26.9748	27.5145	Ribosomal protein L23
Wbm0592|gene685	229.467	8.31205	27.6065	Multisubunit Na+/H+ antiporter, MnhD subunit
Wbm0380|gene428	241.614	8.72607	27.6888	3-polyprenyl-4-hydroxybenzoate decarboxylase, UbiD
Wbm0602|gene697	1410.12	50.6823	27.8227	Cell division GTPase, FtsZ
dapA|gene245	324.404	11.5952	27.9774	Dihydrodipicolinate synthase, DapA
Wbm5017|gene128	212.91	7.59774	28.0228	Ribulose-5-phosphate 4-epimerase related aldolase (pseudogene region)
Wbm0403|gene457	465.977	16.6272	28.025	Phosphoglyceromutase
pleD|gene214	94.3995	3.32803	28.365	PleD-like response regulator containing 2 CheY-like receiver domains and a GGDEF domain
pgk|gene794	114.177	3.98079	28.682	3-phosphoglycerate kinase
rplA|gene749	2688.49	93.4863	28.7581	Ribosomal protein L1
Wbm0215|gene251	91.8001	3.17813	28.8849	hypothetical protein
Wbm0282|gene323	131.312	4.54461	28.894	Type IV secretory pathway, VirB11 component
Wbm5066|gene627	358.433	12.3654	28.9868	Uncharacterized conserved protein (pseudogene region)
Wbm0470|gene537	540.054	18.6215	29.0016	Translation initiation factor 2, IF-2, GTPase
Wbm0260|gene299	178.116	6.12517	29.0794	Dioxygenases related to 2-nitropropane dioxygenase
rho|gene605	4569.75	156.81	29.142	Transcription termination factor, rho
dcd|gene333	257.592	8.80998	29.2387	Deoxycytidine deaminase
Wbm0124|gene149	656.858	22.4191	29.299	Single-stranded DNA-specific exonuclease RecJ
Wbm0112|gene133	327.75	11.155	29.3814	Methionine aminopeptidase
Wbm0123|gene148	1120.74	37.9055	29.5667	Cytochrome c2
Wbm0001|gene0	804.345	27.0506	29.7348	Uroporphyrinogen-III decarboxylase
hemH|gene841	139.743	4.66884	29.931	Protoheme ferro-lyase (ferrochelatase)
Wbm0634|gene733	232.248	7.68804	30.209	ABC-type transport system involved in cytochrome c biogenesis, permease component
Wbm0631|gene730	2758.23	91.0556	30.2917	Protocatechuate 3,4-dioxygenase beta subunit
glyA|gene5	3037.92	99.7879	30.4438	Glycine/serine hydroxymethyltransferase
Wbm0764|gene889	560.064	18.3935	30.449	DNA gyrase, topoisomerase II, B subunit, GyrB
Wbm5014|gene116	77.902	2.55278	30.5165	Type II secretory pathway, component PulD (pseudogene region)
Wbm0585|gene673	2233.15	72.7489	30.6967	Disulfide bond formation protein DsbB
Wbm0420|gene481	952.461	30.7709	30.9533	Folate-dependent phosphoribosylglycinamide formyltransferase PurN
Wbm0110|gene130	557.738	17.7996	31.3343	Inactive homolog of metal-dependent proteases, putative molecular chaperone
Wbm0004|gene4	694.752	22.1222	31.4052	Permease of the major facilitator superfamily
Wbm0793|gene921	241.329	7.67809	31.4309	Type IV secretory pathway, VirB6 components
Wbm0659|gene761	323.296	10.2552	31.5251	hypothetical protein
Wbm0311|gene356	130.926	4.14811	31.5628	Putative Zn-dependent protease, contains TPR repeats
Wbm0031|gene37	121.608	3.80298	31.977	Parvulin-like peptidyl-prolyl isomerase, SurA
Wbm0628|gene726	474.679	14.808	32.0556	Superfamily I DNA and RNA helicase, UvrD
Wbm0518|gene593	426.152	13.2916	32.0618	Diaminopimelate epimerase
Wbm0398|gene452	1923.02	59.8694	32.1202	ABC-type Fe3+ transport system, periplasmic component
Wbm0432|gene494	8966.68	278.812	32.1603	Outer surface protein Wsp
Wbm0356|gene403	549.815	17.0942	32.1638	Acetylglutamate kinase
rpsM|gene365	2563.19	79.6786	32.1691	Ribosomal protein S13
Wbm0348|gene393	176.224	5.45259	32.3193	Predicted aminomethyltransferase related to GcvT
Wbm5046|gene434	465.747	14.3855	32.3761	2-oxoglutarate dehydrogenase complex, E1 component (pseudogene region)
Wbm0542|gene620	254.515	7.85401	32.4057	Uncharacterized conserved protein related to eukaryotic translocase of inner mitochondrial membrane
Wbm0213|gene249	161.725	4.97804	32.4877	hypothetical protein
Wbm0271|gene311	125.972	3.87728	32.4898	Phosphoribosylformylglycinamidine (FGAM) synthase, synthetase domain
Wbm0620|gene718	165.867	5.05875	32.7881	Biotin-(acetyl-CoA carboxylase) ligase
Wbm0692|gene802	667.43	20.2866	32.9	RNase P protein component
Wbm0677|gene786	445.327	13.5127	32.9562	ABC-type spermidine/putrescine transport system, ATPase component
Wbm0715|gene837	1192.51	36.1361	33.0005	ABC-type Zn2+ transport systems, ATPase component
Wbm0060|gene69	4825.31	145.487	33.1666	hypothetical protein
Wbm0016|gene20	111.675	3.36667	33.1708	Multisubunit Na+/H+ antiporter, MnhD subunit
rplR|gene370	541.101	16.2768	33.2437	50S ribosomal protein L18
secF|gene216	150.789	4.52953	33.2902	Preprotein translocase subunit SecF
pyrB|gene438	980.189	29.243	33.5188	Aspartate carbamoyltransferase, catalytic chain
Wbm5092|gene835	1622.83	48.1275	33.7194	Aminoglycoside phosphotransferase (pseudogene region)
Wbm0718|gene840	748.622	21.7723	34.3841	hypothetical protein
Wbm0785|gene913	2259.75	65.6977	34.3962	DnaJ-class molecular chaperone with C-terminal Zn finger domain
Wbm0383|gene435	586.822	17.0394	34.4391	Co/Zn/Cd efflux system component
Wbm0353|gene400	2698.4	76.9414	35.0708	hypothetical protein
Wbm0277|gene317	124.18	3.53879	35.0911	Calcineurin-like phosphoesterase
Wbm0384|gene437	232.58	6.62333	35.1153	Probable extracellular metallopeptidase
Wbm0364|gene411	110.68	3.13223	35.3358	2-methylthioadenine synthetase
Wbm0767|gene893	380.542	10.7318	35.4593	hypothetical protein
Wbm0547|gene626	222.242	6.17823	35.9718	Nucleoside-diphosphate-sugar epimerase
Wbm0598|gene692	566.72	15.7447	35.9943	Protein containing GNAT family acetyltransferase domain
Wbm0289|gene330	1245.8	34.4438	36.1691	Carbonic anhydrase/acetyltransferase, isoleucine patch superfamily
Wbm0773|gene899	170.73	4.70933	36.2536	Helicase subunit of the DNA excision repair complex, UvrB
coaD|gene930	2784.53	76.6152	36.3444	Phosphopantetheine adenylyltransferase
Wbm0674|gene781	2389.39	65.4674	36.4974	Malic enzyme
Wbm0747|gene871	719.743	19.6457	36.6362	Dihydrolipoamide acyltransferase E2 component
Wbm0253|gene290	3251.69	88.1523	36.8872	hypothetical protein
Wbm0291|gene332	621.543	16.6451	37.3409	Predicted membrane protein WF-2
Wbm0113|gene134	727.437	19.4494	37.4015	Actin-like ATPase involved in cell division, FtsA
Wbm0154|gene181	1092.59	29.2087	37.4063	Actin-like ATPase involved in cell morphogenesis, MreB
Wbm5031|gene236	472.015	12.4589	37.8858	Bacterial cell division membrane protein, FtsW (pseudogene region)
Wbm5027|gene206	195.295	5.1215	38.1324	Homoserine kinase (pseudogene region)
Wbm0685|gene795	489.555	12.704	38.5355	Thioredoxin reductase
guaA|gene507	837.576	21.7016	38.5951	GMP synthase
Wbm0076|gene87	1685.84	43.6765	38.5983	WAS family protein
Wbm0661|gene763	1005.98	25.9832	38.7166	Bacterial nucleoid DNA-binding protein, HupA family
Wbm0049|gene58	232.868	5.99425	38.8486	Signal recognition particle GTPase
Wbm0131|gene156	1344.63	34.5692	38.8968	Translation elongation factor P, EF-P
Wbm0062|gene72	1960.28	50.1958	39.0527	hypothetical protein
Wbm0211|gene246	2792.75	70.8306	39.4286	Single-stranded DNA-binding protein, ssb
Wbm0726|gene848	1383.87	34.9281	39.6205	hypothetical protein
Wbm0722|gene844	1189	29.9275	39.7293	ATP-dependent protease HslV, peptidase subunit
Wbm0144|gene170	626.407	15.5851	40.1927	Bacterioferritin/cytochrome b1
Wbm0733|gene857	431.438	10.6687	40.4396	1-acyl-sn-glycerol-3-phosphate acyltransferase
Wbm0098|gene114	165.233	4.07561	40.5419	Dihydroorotate dehydrogenase
Wbm0794|gene922	319.568	7.87534	40.5783	Type IV secretory pathway, VirB6 components
Wbm0241|gene277	2602.88	64.065	40.6287	NADH:ubiquinone oxidoreductase chain A
Wbm0203|gene237	118.254	2.89585	40.8357	ABC-type multidrug transport system, ATPase and permease component
Wbm0071|gene82	1485.1	36.3393	40.8676	Uncharacterized protein conserved in bacteria
Wbm0377|gene425	10540.2	257.394	40.9497	hypothetical protein
Wbm5078|gene699	126.608	3.05715	41.4137	Predicted ATPase with chaperone activity (pseudogene region)
Wbm0612|gene710	101.289	2.41744	41.8993	Xaa-Pro aminopeptidase
Wbm0051|gene60	264.566	6.29002	42.0612	NADPH-dependent glutamate synthase beta chain
rplB|gene383	2927.82	69.488	42.1342	Ribosomal protein L2
Wbm0239|gene275	4978.51	117.37	42.4172	hypothetical protein
Wbm0690|gene800	289.702	6.82285	42.4606	ABC-type phosphate transport system, permease component
rplD|gene385	360.613	8.48844	42.4828	Ribosomal protein L4
Wbm0753|gene877	164.799	3.85827	42.7132	Probable trans-2-enoyl-ACP reductase, FabK
Wbm0092|gene103	3306.72	77.1284	42.8729	Ribosomal protein L25 (general stress protein Ctc)
Wbm0797|gene925	412.368	9.48198	43.4897	Type IV secretory pathway, VirB4 components
Wbm0173|gene202	695.983	15.9948	43.5131	4-diphosphocytidyl-2C-methyl-D-erythritol 2-phosphate synthase
Wbm0791|gene919	501.145	11.4964	43.5915	N6-adenine-specific methylase
sdhB|gene694	264.214	6.053	43.6501	Succinate dehydrogenase Fe-S protein, SdhB
Wbm0309|gene354	222.227	5.06938	43.8371	Membrane-fusion protein
Wbm0283|gene324	97.5271	2.20624	44.2051	Type IV secretory pathway, VirD4 component
Wbm0002|gene1	1081.97	24.285	44.553	Aspartate aminotransferase family enzyme
recA|gene489	1004.31	22.5364	44.5639	RecA recombinase
Wbm0197|gene228	672.177	14.8955	45.1262	Na+/alanine symporter
Wbm0768|gene894	3419.95	75.269	45.4364	Membrane protease subunit, stomatin/prohibitin homolog
Wbm0803|gene932	417.118	9.16148	45.5295	CDP-diglyceride synthetase
Wbm0507|gene581	2761.29	60.6322	45.5416	Ferredoxin
Wbm0679|gene788	2821.96	61.9226	45.5724	Uncharacterized ABC-type transport system, permease component
Wbm0220|gene256	6832.59	149.394	45.7354	Superoxide dismutase, SodA
Wbm0386|gene439	1478.34	31.3919	47.093	Transcriptional regulator of HTH-type, xre family
Wbm0671|gene778	317.414	6.73814	47.1071	DNA uptake lipoprotein
Wbm0556|gene639	210.108	4.45007	47.2145	Glutathione synthase
ruvB|gene289	723.728	15.3105	47.27	Holliday junction resolvasome, helicase subunit, RuvB
Wbm0698|gene810	1338.74	28.3036	47.2993	Cytochrome c oxidase, subunit 3
Wbm0117|gene139	338.223	7.12821	47.4485	Lipoprotein
Wbm0720|gene842	1103.86	23.2345	47.5095	hypothetical protein
Wbm0749|gene873	177.906	3.73818	47.5916	hypothetical protein
Wbm0546|gene625	384.519	8.04455	47.7987	Predicted esterase
Wbm5042|gene420	879.405	18.3436	47.9407	DNA invertase (pseudogene region)
Wbm0038|gene46	773.801	16.0917	48.087	Predicted sulfurtransferase
rpsU|gene596	21095.3	429.973	49.0619	Ribosomal protein S21
Wbm0298|gene340	488.522	9.93669	49.1635	Glyceraldehyde-3-phosphate dehydrogenase, GapA
Wbm0312|gene357	854.609	17.3394	49.2871	3,4-dihydroxy-2-butanone 4-phosphate synthase
Wbm0421|gene482	530.665	10.7119	49.5398	Multisubunit Na+/H+ antiporter, MnhE subunit
Wbm0710|gene827	156.775	3.15251	49.7302	Membrane associated signal transduction histidine kinase and receiver domain
Wbm0287|gene328	31207.8	626.003	49.8525	Ankyrin repeat-containing protein
Wbm0483|gene553	1001.54	19.7803	50.6332	ABC-type transport system, involved in lipoprotein release, permease component
Wbm0775|gene901	3109.72	61.0468	50.9399	Cytochrome b subunit of the bc complex
Wbm0108|gene127	1567.83	30.67	51.1193	Dihydrolipoamide acyltransferase E2 component
Wbm0055|gene64	209.156	4.04853	51.6622	Predicted membrane-associated Zn-dependent protease
Wbm0702|gene817	2134.48	41.2551	51.7386	hypothetical protein
Wbm0464|gene530	164.613	3.17496	51.8473	Seryl-tRNA synthetase
hemC|gene904	556.663	10.5525	52.7518	Porphobilinogen deaminase
rplP|gene379	7143.25	134.799	52.9919	Ribosomal protein L16
Wbm0402|gene456	1807.97	34.087	53.0399	(acyl-carrier-protein) S-malonyltransferase, FabD
Wbm0125|gene150	2247.3	42.2388	53.2046	NADH:ubiquinone oxidoreductase chain D
Wbm0499|gene571	202.679	3.76416	53.8444	DNA polymerase III alpha subunit
gatB|gene819	746.706	13.8389	53.957	Asp-tRNAAsn/Glu-tRNAGln amidotransferase B subunit
Wbm0259|gene298	447.336	8.19503	54.5863	Dephospho-CoA kinase
Wbm0431|gene493	1838.66	33.2835	55.2424	DNA-directed RNA polymerase sigma 32 subunit, RpoH subfamily
Wbm5065|gene623	1350.46	24.3246	55.5183	Uncharacterized conserved protein (pseudogene region)
Wbm0463|gene529	2482.71	44.7152	55.5227	Predicted membrane-associated or secreted protein
Wbm0308|gene353	4248.17	75.3891	56.3499	Cytochrome c oxidase, subunit 2
Wbm0549|gene631	368.016	6.52527	56.3986	Predicted acid phosphatase
Wbm0541|gene619	6734.22	116.77	57.6708	Preprotein translocase subunit SecB
engB|gene404	1108.24	19.1665	57.8217	Predicted GTPase
Wbm0160|gene187	234.563	4.05182	57.8908	tRNA nucleotidyltransferase/poly(A) polymerase
ispH|gene54	258.884	4.47175	57.8932	4-Hydroxy-3-methylbut-2-enyl diphosphate reductase, IspH
Wbm0705|gene820	1184.08	20.3703	58.1278	F0F1-type ATP synthase, gamma subunit
Wbm0707|gene822	36310.7	623.875	58.2019	Cold shock protein
rplL|gene747	865.704	14.6696	59.0135	Ribosomal protein L7/L12
Wbm0136|gene162	499.65	8.42781	59.2859	hypothetical protein
Wbm0097|gene110	3422.13	57.6765	59.3332	DhnA-type fructose-1,6-bisphosphate aldolase
Wbm0745|gene869	227.015	3.82394	59.3668	Primosomal protein N', superfamily II helicase, PriA
Wbm0015|gene19	282.756	4.69905	60.173	Bacterial cell division membrane protein, FtsW
Wbm5022|gene147	1748.11	28.8485	60.5962	Alpha/beta superfamily hydrolase (pseudogene region)
Wbm0610|gene708	5085.97	83.4038	60.9801	hypothetical protein
Wbm0148|gene174	496.656	8.08551	61.4254	thymidylate kinase
rpsB|gene937	5529.77	89.6229	61.7004	Ribosomal protein S2
Wbm0387|gene440	14630.6	236.118	61.9631	DNA-directed RNA polymerase subunit omega, RpoZ
argS|gene239	474.741	7.66097	61.9688	Arginyl-tRNA synthetase
Wbm5059|gene544	451.582	7.27959	62.034	Transposase and inactivated derivatives (pseudogene region)
Wbm5009|gene80	1640.66	26.3145	62.3481	Ornithine/acetylornithine aminotransferase (pseudogene region)
Wbm0613|gene711	6117.76	97.8385	62.5292	hypothetical protein
groES|gene394	71386	1111.78	64.2087	Co-chaperonin GroES (HSP10)
Wbm0127|gene152	1338.73	20.7636	64.4749	Peroxiredoxin
gltX|gene518	190.784	2.83962	67.1865	Glutamyl- and glutaminyl-tRNA synthetase
Wbm0392|gene445	6401.46	93.8545	68.2062	Multisubunit Na+/H+ antiporter, MnhC subunit
Wbm0043|gene51	916.624	13.4072	68.368	hypothetical protein
Wbm0678|gene787	26377.6	384.707	68.5654	Sec-independent protein secretion pathway component, TatA
glpX|gene185	4123.86	59.9254	68.8166	Fructose-1,6-bisphosphatase
Wbm0255|gene292	2076.64	29.7336	69.8415	Glutamine phosphoribosylpyrophosphate amidotransferase
rpmF|gene714	141134	2018.09	69.9344	Ribosomal protein L32
Wbm0177|gene207	400.363	5.68633	70.408	Dihydrodipicolinate reductase
Wbm0728|gene852	467.869	6.64088	70.4529	Uroporphyrinogen-III synthase
Wbm0490|gene562	7941.4	111.162	71.4399	Integral membrane protein, interacts with FtsH
Wbm0058|gene67	4888.8	68.1056	71.7826	Bacterial nucleoid DNA-binding protein, HupA family
Wbm5056|gene522	2177.24	29.8707	72.8888	Glycosyltransferase, probably involved in cell wall biogenesis (pseudogene region)
pheS|gene98	1679.76	22.93	73.256	Phenylalanyl-tRNA synthetase alpha subunit
pheT|gene527	610.349	8.2134	74.3114	Phenylalanyl-tRNA synthetase beta subunit
Wbm0100|gene117	407.284	5.45669	74.6394	Outer surface protein Wsp
Wbm0047|gene56	10185.6	136.132	74.8215	hypothetical protein
ruvA|gene288	670.773	8.7822	76.3787	Holliday junction resolvasome, DNA-binding subunit, RuvA
Wbm5032|gene240	731.088	9.46362	77.2525	Uncharacterized protein, homolog of microcin C7 resistance protein MccF (pseudogene region)
Wbm0408|gene466	474.209	6.13192	77.3345	Triosephosphate isomerase
Wbm0608|gene705	26912.6	347.207	77.5117	Thioredoxin, trx
Wbm0272|gene312	258.079	3.24231	79.5973	RecB exonuclease
rplM|gene660	6629.27	82.7865	80.0767	Ribosomal protein L13
Wbm0399|gene453	1917.1	23.9083	80.1855	hypothetical protein
Wbm0694|gene806	371.489	4.59189	80.9011	Predicted methyltransferase, contains N-terminal TPR repeats
Wbm0560|gene643	1026.27	12.6814	80.9272	PQQ-like beta-propeller repeat-containing protein
Wbm0054|gene63	521.894	6.40638	81.4647	Outer membrane protein/protective antigen OMA87
Wbm0567|gene650	5058.14	61.5665	82.1573	Peroxiredoxin
Wbm0042|gene50	375.248	4.54871	82.4955	Aspartate-semialdehyde dehydrogenase
Wbm0475|gene545	7932.13	94.4189	84.01	Short-chain alcohol dehydrogenase family enzyme
Wbm0672|gene779	2427.4	28.5246	85.0985	hypothetical protein
Wbm0471|gene538	6414.02	75.0706	85.4398	NADH:ubiquinone oxidoreductase chain I
rpmG|gene569	9479.4	110.724	85.6129	Ribosomal protein L33
Wbm5068|gene629	4485.51	52.2487	85.8492	coenzyme pqq synthesis protein c (pseudogene region)
Wbm0024|gene30	6416.49	74.4191	86.221	HesB/YadR/YfhF family protein
Wbm0637|gene736	1137.48	13.1756	86.3323	hypothetical protein
Wbm0732|gene856	431.671	4.98848	86.5336	Site-specific recombinase XerD
rpsL|gene391	10221.2	116.681	87.5995	Ribosomal protein S12
Wbm0050|gene59	1596.74	17.9797	88.8079	Multisubunit Na+/H+ antiporter, MnhD subunit
Wbm0147|gene173	4203.78	46.7685	89.8849	thiol-disulfide isomerase
Wbm0275|gene315	599.113	6.44918	92.8975	glutamine synthetase
Wbm0115|gene136	637.507	6.70848	95.03	Uracil-DNA glycosylase
Wbm0516|gene591	3601.01	37.8754	95.0752	hypothetical protein
Wbm5064|gene616	217.392	2.25252	96.5106	cation/multidrug efflux pump (pseudogene region)
Wbm0633|gene732	518.608	5.28571	98.1151	Predicted nucleotide kinase, YdiA family
Wbm0545|gene624	2776.12	28.2696	98.2016	NADH:ubiquinone oxidoreductase 18 kDa subunit
Wbm0345|gene390	1011.71	10.2185	99.0077	Ribosomal protein S7
era|gene8	1685.69	16.616	101.45	GTPase
Wbm0581|gene668	467.556	4.57176	102.27	Uncharacterized secreted protein containing pentapeptide repeats
Wbm0406|gene463	7594.93	73.8407	102.856	Rieske Fe-S protein
apaG|gene48	6347.88	59.859	106.047	Uncharacterized protein affecting Mg2+/Co2+ transport
Wbm0529|gene606	1776.04	16.5368	107.399	Uncharacterized protein conserved in bacteria
Wbm0787|gene915	822.659	7.42272	110.83	Orotidine-5'-phosphate decarboxylase
Wbm0247|gene283	4374.86	39.2368	111.499	Uncharacterized homolog of plant Iojap protein
Wbm0572|gene658	2573.12	22.6763	113.472	Bacterial nucleoid DNA-binding protein, HupA family
Wbm0397|gene451	5319.89	46.8634	113.519	Phosphoribosylcarboxyaminoimidazole (NCAIR) mutase, PurE
ispG|gene909	378.396	3.32561	113.782	1-hydroxy-2-methyl-2-(e)-butenyl 4-diphosphate synthase
Wbm0740|gene864	407.379	3.39441	120.015	UDP-N-acetylglucosamine enolpyruvyl transferase
Wbm0437|gene499	37605.1	310.507	121.109	hypothetical protein
Wbm0623|gene721	957.377	7.88486	121.42	NADH:ubiquinone oxidoreductase chain L
Wbm0446|gene511	1792.87	14.6523	122.361	Dihydroorotase, PyrC
Wbm5087|gene816	4245.14	34.2564	123.923	Ankyrin repeat containing protein (pseudogene region)
Wbm0459|gene525	63499.4	504.836	125.782	F0F1-type ATP synthase, subunit c
Wbm0153|gene180	774.698	6.13791	126.215	Zn-dependent carboxypeptidase
rpsO|gene25	26229.6	205.821	127.439	Ribosomal protein S15
Wbm5048|gene459	462.884	3.61527	128.036	Ankyrin repeats containing protein (pseudogene region)
Wbm0064|gene74	576.488	4.46752	129.04	2-polyprenyl-6-methoxyphenol hydroxylase, FAD-dependent oxidoreductase
Wbm0655|gene757	5374.68	40.5888	132.418	hypothetical protein
Wbm0196|gene227	370.408	2.70604	136.882	Methionyl-tRNA synthetase
rpmJ|gene731	48371	351.747	137.516	Ribosomal protein L36
Wbm0378|gene426	43228.2	313.344	137.958	hypothetical protein
ndk|gene839	5142.55	37.2727	137.971	Nucleoside diphosphate kinase
Wbm0166|gene193	6879.96	49.3369	139.449	hypothetical protein
Wbm0559|gene642	1178.84	7.97589	147.8	Dihydrolipoamide dehydrogenase E3 component
Wbm0041|gene49	608.819	4.09845	148.549	Phosphoribosylaminoimidazole carboxylase (NCAIR synthetase)
Wbm0625|gene723	1643.06	11.0339	148.91	NADH:ubiquinone oxidoreductase chain J
Wbm0044|gene52	718.401	4.70747	152.609	Amino acid transporter
Wbm0766|gene892	5670.8	35.7704	158.533	Uncharacterized protein involved in tolerance to divalent cations
Wbm0300|gene344	1450.34	8.57517	169.133	Uncharacterized conserved membrane protein
Wbm0441|gene504	711.549	4.18336	170.09	Aspartokinase
Wbm0606|gene702	2444.01	14.2288	171.765	Membrane protein related to metalloendopeptidase
Wbm0597|gene690	913.957	5.05171	180.92	Glycerol-3-phosphate dehydrogenase
Wbm5073|gene679	1588.9	8.77189	181.135	Pyridoxamine-phosphate oxidase (pseudogene region)
Wbm5025|gene194	2504.26	13.5796	184.413	Putative prohead protease (pseudogene region)
Wbm0152|gene179	36437.8	195.475	186.406	Outer membrane protein, pal-like
Wbm0751|gene875	6259.91	33.2245	188.412	hypothetical protein
Wbm5004|gene14	3101.94	16.1843	191.664	Fic domain containing protein (pseudogene region)
Wbm0369|gene416	1420.61	6.91269	205.508	Phosphatidylglycerophosphatase A, PgpA
Wbm0401|gene455	96986	422.69	229.449	Ribosomal protein L31
trmD|gene264	4253.8	18.384	231.386	tRNA-(guanine-N1)-methyltransferase
Wbm0686|gene796	8990.97	38.002	236.592	Transaldolase
rpmI|gene760	252689	992.96	254.481	Ribosomal protein L35
Wbm0737|gene861	1268.22	4.86789	260.528	Geranylgeranyl pyrophosphate synthase
Wbm0583|gene671	6052.55	20.3033	298.107	Inorganic pyrophosphatase
rplU|gene815	8584.23	25.2643	339.777	Ribosomal protein L21
Wbm0379|gene427	4187.62	11.9181	351.366	Cardiolipin synthase family enzyme
Wbm0451|gene516	19367.8	51.114	378.914	hypothetical protein
Wbm0756|gene881	9093.7	13.7476	661.475	scaffold protein
Wbm0190|gene220	55647.7	76.3489	728.861	Transcription termination factor, NusB
ddl|gene655	215.476	0	#DIV/0!	D-alanine-D-alanine ligase
fabZ|gene61	14.536	0	#DIV/0!	3-hydroxymyristoyl/3-hydroxydecanoyl-(acyl carrier protein) dehydratases
glyQ|gene417	451.945	0	#DIV/0!	Glycyl-tRNA synthetase, alpha subunit
gmk|gene667	62.1755	0	#DIV/0!	Guanylate kinase
lipB|gene270	315.632	0	#DIV/0!	Lipoate-protein ligase B
mraW|gene125	135.556	0	#DIV/0!	Predicted S-adenosylmethionine-dependent methyltransferase involved in cell envelope biogenesis
nrdF|gene307	171.503	0	#DIV/0!	Ribonucleotide reductase, beta subunit
recR|gene870	330.842	0	#DIV/0!	Recombinational DNA repair protein RecR
rplC|gene386	600.247	0	#DIV/0!	Ribosomal protein L3
rplQ|gene362	25.9976	0	#DIV/0!	50S ribosomal protein L17
rpmH|gene801	4332.7	0	#DIV/0!	Ribosomal protein L34
rpsH|gene372	1241.92	0	#DIV/0!	Ribosomal protein S8
rpsJ|gene387	1098.18	0	#DIV/0!	Ribosomal protein S10
rpsN|gene373	234.178	0	#DIV/0!	30S ribosomal protein S14
rpsT|gene858	1981.89	0	#DIV/0!	Ribosomal protein S20
secG|gene199	606.832	0	#DIV/0!	Preprotein translocase subunit SecG
smpB|gene91	800.747	0	#DIV/0!	SsrA-binding protein
Wbm0003|gene3	140.288	0	#DIV/0!	hypothetical protein
Wbm0009|gene10	76.413	0	#DIV/0!	hypothetical protein
Wbm0011|gene15	83.7256	0	#DIV/0!	Permease of the major facilitator superfamily
Wbm0017|gene21	2966.56	0	#DIV/0!	NADH:ubiquinone oxidoreductase 17.2 kD subunit
Wbm0018|gene22	160.571	0	#DIV/0!	ABC-type transport system involved in resistance to organic solvents, periplasmic component
Wbm0027|gene33	2160.48	0	#DIV/0!	hypothetical protein
Wbm0030|gene36	97.4209	0	#DIV/0!	hypothetical protein
Wbm0034|gene42	74.5664	0	#DIV/0!	hypothetical protein
Wbm0035|gene43	57.8866	0	#DIV/0!	hypothetical protein
Wbm0036|gene44	260.41	0	#DIV/0!	hypothetical protein
Wbm0039|gene47	76.3252	0	#DIV/0!	ABC-type Fe3+ transport system, permease component
Wbm0045|gene53	212.18	0	#DIV/0!	Amino acid transporter
Wbm0048|gene57	249.332	0	#DIV/0!	Uncharacterized protein involved in an early stage of isoprenoid biosynthesis
Wbm0056|gene65	164.053	0	#DIV/0!	hypothetical protein
Wbm0065|gene75	21.554	0	#DIV/0!	hypothetical protein
Wbm0066|gene76	290.95	0	#DIV/0!	hypothetical protein
Wbm0067|gene77	45.2248	0	#DIV/0!	hypothetical protein
Wbm0068|gene78	40.273	0	#DIV/0!	hypothetical protein
Wbm0069|gene79	12.9533	0	#DIV/0!	hypothetical protein
Wbm0070|gene81	79.3961	0	#DIV/0!	Putative Mg2+ and Co2+ transporter CorB
Wbm0074|gene85	92.4719	0	#DIV/0!	Predicted xylanase/chitin deacetylase
Wbm0081|gene92	366.58	0	#DIV/0!	hypothetical protein
Wbm0083|gene94	58.0184	0	#DIV/0!	Riboflavin synthase alpha chain
Wbm0084|gene95	32.1948	0	#DIV/0!	hypothetical protein
Wbm0085|gene96	496.4	0	#DIV/0!	hypothetical protein
Wbm0086|gene97	221.778	0	#DIV/0!	hypothetical protein
Wbm0089|gene100	519.771	0	#DIV/0!	hypothetical protein
Wbm0090|gene101	79.6758	0	#DIV/0!	hypothetical protein
Wbm0094|gene106	34.8087	0	#DIV/0!	hypothetical protein
Wbm0095|gene107	84.7567	0	#DIV/0!	hypothetical protein
Wbm0096|gene108	71.7834	0	#DIV/0!	Predicted membrane protein WF-2
Wbm0104|gene121	32.4224	0	#DIV/0!	hypothetical protein
Wbm0116|gene137	30.9461	0	#DIV/0!	hypothetical protein
Wbm0128|gene153	37.1357	0	#DIV/0!	Membrane associated signal transduction histidine kinase
Wbm0132|gene157	276.5	0	#DIV/0!	Probable fructose-1,6-bisphosphatase, inositol monophosphatase family
Wbm0134|gene159	143.97	0	#DIV/0!	hypothetical protein
Wbm0135|gene160	84.5966	0	#DIV/0!	hypothetical protein
Wbm0137|gene163	1071.16	0	#DIV/0!	hypothetical protein
Wbm0139|gene165	124.23	0	#DIV/0!	hypothetical protein
Wbm0140|gene166	63.5473	0	#DIV/0!	hypothetical protein
Wbm0141|gene167	84.3643	0	#DIV/0!	hypothetical protein
Wbm0142|gene168	77.1069	0	#DIV/0!	Predicted phosphatase
Wbm0143|gene169	98.2207	0	#DIV/0!	Predicted membrane protein
Wbm0156|gene183	47.6341	0	#DIV/0!	hypothetical protein
Wbm0157|gene184	817.38	0	#DIV/0!	hypothetical protein
Wbm0161|gene188	537.112	0	#DIV/0!	hypothetical protein
Wbm0162|gene189	100.329	0	#DIV/0!	hypothetical protein
Wbm0164|gene191	292.45	0	#DIV/0!	hypothetical protein
Wbm0165|gene192	1177.99	0	#DIV/0!	hypothetical protein
Wbm0168|gene197	287.345	0	#DIV/0!	Cytosine/adenosine deaminase
Wbm0171|gene200	296.405	0	#DIV/0!	RadC-like DNA repair protein
Wbm0174|gene203	403.463	0	#DIV/0!	hypothetical protein
Wbm0178|gene208	51.7719	0	#DIV/0!	ABC-type phosphate transport system, ATPase component
Wbm0183|gene213	1421.12	0	#DIV/0!	hypothetical protein
Wbm0185|gene215	334.491	0	#DIV/0!	hypothetical protein
Wbm0192|gene222	119.378	0	#DIV/0!	Nucleotide-binding protein implicated in inhibition of septum formation
Wbm0199|gene230	274.634	0	#DIV/0!	hypothetical protein
Wbm0200|gene233	549.153	0	#DIV/0!	hypothetical protein
Wbm0201|gene234	280.743	0	#DIV/0!	Permease of the major facilitator superfamily
Wbm0204|gene238	3209.79	0	#DIV/0!	hypothetical protein
Wbm0206|gene241	475.641	0	#DIV/0!	Pseudouridylate synthases, 23S RNA-specific
Wbm0212|gene247	73.9176	0	#DIV/0!	hypothetical protein
Wbm0214|gene250	49.646	0	#DIV/0!	hypothetical protein
Wbm0224|gene260	124.977	0	#DIV/0!	hypothetical protein
Wbm0225|gene261	458.242	0	#DIV/0!	hypothetical protein
Wbm0232|gene268	113.571	0	#DIV/0!	Phosphoribosylformylglycinamidine (FGAM) synthase, glutamine amidotransferase domain
Wbm0236|gene271	349.274	0	#DIV/0!	Pentose-5-phosphate-3-epimerase
Wbm0238|gene274	159.265	0	#DIV/0!	UDP-N-acetylmuramyl pentapeptide synthase
Wbm0246|gene282	162.631	0	#DIV/0!	MutT/Nudix family pyrophosphatase
Wbm0249|gene285	596.085	0	#DIV/0!	Predicted protein WF-4
Wbm0250|gene287	7461.98	0	#DIV/0!	hypothetical protein
Wbm0254|gene291	223.426	0	#DIV/0!	3-methyladenine DNA glycosylase
Wbm0256|gene294	524.862	0	#DIV/0!	5-formyltetrahydrofolate cyclo-ligase
Wbm0264|gene303	7226.8	0	#DIV/0!	hypothetical protein
Wbm0265|gene304	240.823	0	#DIV/0!	Predicted protein, WF-1
Wbm0268|gene308	530.374	0	#DIV/0!	Small protein A, tmRNA-binding
Wbm0269|gene309	714.153	0	#DIV/0!	hypothetical protein
Wbm0279|gene320	59.907	0	#DIV/0!	Type IV secretory pathway, component VirB8
Wbm0281|gene322	343.78	0	#DIV/0!	Type IV secretory pathway, VirB10 component
Wbm0286|gene327	42.6926	0	#DIV/0!	Cytochrome c biogenesis factor
Wbm0290|gene331	115.336	0	#DIV/0!	D-alanyl-D-alanine carboxypeptidase
Wbm0301|gene345	42.5405	0	#DIV/0!	Uncharacterized protein conserved in bacteria
Wbm0315|gene360	1268.6	0	#DIV/0!	F0F1-type ATP synthase, delta subunit
Wbm0321|gene366	193.525	0	#DIV/0!	Adenylate kinase
Wbm0333|gene378	1103.19	0	#DIV/0!	50S ribosomal protein L29
Wbm0347|gene392	138.726	0	#DIV/0!	hypothetical protein
Wbm0360|gene407	109.076	0	#DIV/0!	hypothetical protein
Wbm0366|gene413	2488.35	0	#DIV/0!	hypothetical protein
Wbm0368|gene415	739.366	0	#DIV/0!	hypothetical protein
Wbm0381|gene429	71.8869	0	#DIV/0!	hypothetical protein
Wbm0382|gene431	48.5658	0	#DIV/0!	Protein-disulfide isomerase
Wbm0404|gene460	161.119	0	#DIV/0!	Predicted protein, WF-1
Wbm0410|gene469	440.94	0	#DIV/0!	hypothetical protein
Wbm0415|gene476	453.886	0	#DIV/0!	Glutaredoxin
Wbm0422|gene483	133.943	0	#DIV/0!	hypothetical protein
Wbm0423|gene484	192.261	0	#DIV/0!	Uncharacterized conserved membrane protein, YgiH family
Wbm0435|gene497	200.061	0	#DIV/0!	Glutathione S-transferase
Wbm0436|gene498	62.8348	0	#DIV/0!	Predicted O-methyltransferase
Wbm0440|gene502	32.6547	0	#DIV/0!	ABC-type transport system involved in resistance to organic solvents, auxiliary component
Wbm0444|gene508	445.514	0	#DIV/0!	hypothetical protein
Wbm0450|gene515	1496.78	0	#DIV/0!	hypothetical protein
Wbm0454|gene519	941.087	0	#DIV/0!	hypothetical protein
Wbm0455|gene520	144.169	0	#DIV/0!	Acetyl/propionyl-CoA carboxylase, alpha subunit
Wbm0466|gene532	565.571	0	#DIV/0!	hypothetical protein
Wbm0467|gene533	235.758	0	#DIV/0!	hypothetical protein
Wbm0468|gene534	541.111	0	#DIV/0!	hypothetical protein
Wbm0477|gene547	1200.1	0	#DIV/0!	hypothetical protein
Wbm0478|gene548	83.8856	0	#DIV/0!	hypothetical protein
Wbm0485|gene556	30.5517	0	#DIV/0!	Succinate dehydrogenase subunit D sdhD, hydrophobic membrane anchor protein
Wbm0487|gene559	146.909	0	#DIV/0!	hypothetical protein
Wbm0488|gene560	1023.05	0	#DIV/0!	Smr/mutS family protein
Wbm0489|gene561	94.0824	0	#DIV/0!	rRNA methylases
Wbm0492|gene564	64.5826	0	#DIV/0!	UDP-N-acetylmuramyl tripeptide synthase
Wbm0494|gene566	6489.2	0	#DIV/0!	Stress-induced morphogen, BolA
Wbm0505|gene579	142.265	0	#DIV/0!	Uncharacterized protein involved in biosynthesis of c-type cytochromes
Wbm0510|gene584	6364.68	0	#DIV/0!	hypothetical protein
Wbm0511|gene585	65.423	0	#DIV/0!	hypothetical protein
Wbm0513|gene587	408.098	0	#DIV/0!	hypothetical protein
Wbm0514|gene588	212.083	0	#DIV/0!	hypothetical protein
Wbm0515|gene589	636.585	0	#DIV/0!	hypothetical protein
Wbm0517|gene592	100.471	0	#DIV/0!	Nitroreductase
Wbm0522|gene599	67.5109	0	#DIV/0!	hypothetical protein
Wbm0523|gene600	116.885	0	#DIV/0!	hypothetical protein
Wbm0524|gene601	190.312	0	#DIV/0!	hypothetical protein
Wbm0525|gene602	212.613	0	#DIV/0!	hypothetical protein
Wbm0526|gene603	741.7	0	#DIV/0!	hypothetical protein
Wbm0533|gene610	653.917	0	#DIV/0!	Molecular chaperone GrpE (heat shock protein)
Wbm0534|gene611	101.269	0	#DIV/0!	Tryptophanyl-tRNA synthetase
Wbm0557|gene640	243.145	0	#DIV/0!	UDP-N-acetylglucosamine:LPS N-acetylglucosamine transferase
Wbm0558|gene641	375.52	0	#DIV/0!	hypothetical protein
Wbm0563|gene646	605.554	0	#DIV/0!	hypothetical protein
Wbm0564|gene647	221.119	0	#DIV/0!	hypothetical protein
Wbm0568|gene651	71.9284	0	#DIV/0!	Acetylornithine deacetylase/Succinyl-diaminopimelate desuccinylase
Wbm0571|gene656	137.035	0	#DIV/0!	Cell division septal protein
Wbm0579|gene666	60.8978	0	#DIV/0!	DnaK suppressor protein
Wbm0589|gene678	37.882	0	#DIV/0!	Formamidopyrimidine-DNA glycosylase
Wbm0590|gene680	354.498	0	#DIV/0!	Predicted protein WF-5
Wbm0594|gene687	945.245	0	#DIV/0!	NADH:ubiquinone oxidoreductase chain E
Wbm0595|gene688	60.571	0	#DIV/0!	hypothetical protein
Wbm0596|gene689	977.51	0	#DIV/0!	Response regulator consisting of a CheY-like receiver domain and wHTH-type DNA-binding domain
Wbm0601|gene695	66.4039	0	#DIV/0!	Predicted metal-dependent hydrolase
Wbm0604|gene700	370.638	0	#DIV/0!	hypothetical protein
Wbm0607|gene703	38.8548	0	#DIV/0!	hypothetical protein
Wbm0609|gene706	789.595	0	#DIV/0!	Ribonuclease D
Wbm0618|gene716	50.9969	0	#DIV/0!	ABC-type transport system involved in resistance to organic solvents, ATPase component
Wbm0619|gene717	319.537	0	#DIV/0!	Cytochrome c-type biogenesis protein CcmE
Wbm0622|gene720	349.249	0	#DIV/0!	NADH:ubiquinone oxidoreductase chain M
Wbm0624|gene722	5935.28	0	#DIV/0!	NADH:ubiquinone oxidoreductase chain K
Wbm0626|gene724	64.1284	0	#DIV/0!	hypothetical protein
Wbm0627|gene725	187.092	0	#DIV/0!	Predicted protein WF-5
Wbm0629|gene727	116.696	0	#DIV/0!	NADPH:quinone reductase
Wbm0636|gene735	78.4653	0	#DIV/0!	tRNA delta(2)-isopentenylpyrophosphate transferase
Wbm0638|gene737	246.359	0	#DIV/0!	Putative translation factor, SUA5
Wbm0639|gene738	70.5315	0	#DIV/0!	ATPase involved in DNA replication, HolB
Wbm0640|gene739	301.114	0	#DIV/0!	hypothetical protein
Wbm0645|gene744	600.627	0	#DIV/0!	YggT family membrane protein
Wbm0662|gene765	66.4245	0	#DIV/0!	Uncharacterized protein conserved in bacteria
Wbm0665|gene769	368.028	0	#DIV/0!	hypothetical protein
Wbm0673|gene780	945.589	0	#DIV/0!	Phosphatidylglycerophosphate synthase
Wbm0675|gene782	1426.45	0	#DIV/0!	Stress-induced morphogen, BolA
Wbm0681|gene790	415.106	0	#DIV/0!	Uncharacterized conserved membrane protein
Wbm0682|gene791	71.1132	0	#DIV/0!	hypothetical protein
Wbm0683|gene793	526.776	0	#DIV/0!	hypothetical protein
Wbm0688|gene798	53.581	0	#DIV/0!	F0F1-type ATP synthase, epsilon subunit
Wbm0695|gene807	64.7929	0	#DIV/0!	Ribonucleotide reductase, alpha subunit
Wbm0696|gene808	70.8083	0	#DIV/0!	Predicted endonuclease involved in recombination, RNase H fold, yqgF family
Wbm0697|gene809	279.864	0	#DIV/0!	Holliday junction resolvasome, endonuclease subunit, RuvC
Wbm0703|gene818	360.334	0	#DIV/0!	hypothetical protein
Wbm0712|gene832	933.127	0	#DIV/0!	hypothetical protein
Wbm0713|gene834	591.811	0	#DIV/0!	Predicted protein WF-4
Wbm0716|gene838	169.871	0	#DIV/0!	ABC-type Zn2+ transport system, periplasmic component
Wbm0721|gene843	75.7439	0	#DIV/0!	Glutamate-cysteine ligase
Wbm0724|gene846	96.0984	0	#DIV/0!	hypothetical protein
Wbm0730|gene854	129.286	0	#DIV/0!	Predicted permease
Wbm0731|gene855	40.4719	0	#DIV/0!	Possible ATPase involved in DNA replication initiation, DnaA paralog
Wbm0744|gene868	154.468	0	#DIV/0!	hypothetical protein
Wbm0748|gene872	260.384	0	#DIV/0!	hypothetical protein
Wbm0752|gene876	37.8647	0	#DIV/0!	Predicted protein WF-3
Wbm0757|gene882	399.441	0	#DIV/0!	HesB/YadR/YfhF family protein
Wbm0760|gene885	304.323	0	#DIV/0!	Signal peptidase I
Wbm0761|gene886	484.534	0	#DIV/0!	hypothetical protein
Wbm0776|gene902	84.6283	0	#DIV/0!	hypothetical protein
Wbm0780|gene907	367.221	0	#DIV/0!	hypothetical protein
Wbm0781|gene908	1296.71	0	#DIV/0!	hypothetical protein
Wbm0783|gene911	110.952	0	#DIV/0!	hypothetical protein
Wbm0789|gene917	138.217	0	#DIV/0!	Na+/H+-dicarboxylate symporter
Wbm0798|gene926	460.773	0	#DIV/0!	Type IV secretory pathway, VirB3 components
Wbm0802|gene931	21327.7	0	#DIV/0!	NADH:ubiquinone oxidoreductase Fe-S subunit
Wbm5002|gene6	100.148	0	#DIV/0!	Predicted endonuclease containing a URI domain (pseudogene region)
Wbm5005|gene23	163.073	0	#DIV/0!	Possible phage related protein (pseudogene region)
Wbm5006|gene26	282.547	0	#DIV/0!	Pseudouridine synthase (pseudogene region)
Wbm5007|gene40	403.192	0	#DIV/0!	Predicted ATPase, AAA+ superfamily (pseudogene region)
Wbm5010|gene105	1887.05	0	#DIV/0!	Ankyrin repeats containing protein (pseudogene region)
Wbm5013|gene113	15.8991	0	#DIV/0!	Periplasmic protease (pseudogene region)
Wbm5015|gene123	10.0033	0	#DIV/0!	Permease of the major facilitator superfamily (pseudogene region)
Wbm5016|gene126	24.5611	0	#DIV/0!	Ankyrin repeats containing protein (pseudogene region)
Wbm5019|gene132	158.441	0	#DIV/0!	Predicted aminoglycoside phosphotransferase (pseudogene region)
Wbm5021|gene145	840.104	0	#DIV/0!	Thio:disulfide interchange protein (pseudogene region)
Wbm5023|gene161	417.852	0	#DIV/0!	Ankyrin repeats containing protein (pseudogene region)
Wbm5024|gene175	38.6752	0	#DIV/0!	Outer membrane protein (pseudogene region)
Wbm5028|gene226	1917.62	0	#DIV/0!	Possible outer membrane protein (pseudogene region)
Wbm5030|gene232	307.302	0	#DIV/0!	Phage terminase related protein (pseudogene region)
Wbm5032.1|gene269	49.2773	0	#DIV/0!	Uncharacterized protein, homolog of microcin C7 resistance protein MccF (pseudogene region)
Wbm5033|gene286	103.495	0	#DIV/0!	Virulence protein (pseudogene region)
Wbm5035|gene295	102.958	0	#DIV/0!	Unchracterized conserved protein (pseudogene region)
Wbm5038|gene341	241.997	0	#DIV/0!	Transposase, probably inactivated (pseudogene region)
Wbm5039|gene348	74.5966	0	#DIV/0!	Possible phage related protein (pseudogene region)
Wbm5043|gene430	201.564	0	#DIV/0!	Predicted ATPase, AAA+ superfamily (pseudogene region)
Wbm5044|gene432	2510.28	0	#DIV/0!	Possible phage related protein (pseudogene region)
Wbm5047|gene449	637.993	0	#DIV/0!	Ankyrin repeat containing protein (pseudogene region)
Wbm5050|gene470	737.677	0	#DIV/0!	Unchracterized conserved protein (pseudogene region)
Wbm5051|gene474	245.657	0	#DIV/0!	DnaJ-related protein (pseudogene region)
Wbm5053|gene503	162.747	0	#DIV/0!	Folylpolyglutamate synthase (pseudogene region)
Wbm5054|gene505	297.396	0	#DIV/0!	Unchracterized conserved protein (pseudogene region)
Wbm5055|gene510	24.5549	0	#DIV/0!	Uncharacterized conserved phage related protein (pseudogene region)
Wbm5057|gene535	73.5075	0	#DIV/0!	Periplasmic component of the Tol biopolymer transport system (pseudogene region)
Wbm5058|gene541	156.544	0	#DIV/0!	Unchracterized conserved protein (pseudogene region)
Wbm5060|gene554	99.1172	0	#DIV/0!	Mannose-6-phosphate isomerase/Mannose-1-phosphate guanylyltransferase (pseudogene region)
Wbm5061|gene577	14.0988	0	#DIV/0!	Ankyrin repeats containing protein (pseudogene region)
Wbm5063|gene598	1355.33	0	#DIV/0!	Drug resistance transporter, Bcr/CflA family protein (pseudogene region)
Wbm5067|gene628	415.386	0	#DIV/0!	Dihydropteroate synthase (pseudogene region)
Wbm5070|gene653	167.354	0	#DIV/0!	Predicted Rossmann fold nucleotide-binding protein involved in DNA uptake (pseudogene region)
Wbm5071|gene657	259.868	0	#DIV/0!	Pyridoxal phosphate biosynthetic protein PdxJ (pseudogene region)
Wbm5072|gene663	316.174	0	#DIV/0!	Uncharacterized conserved protein (pseudogene region)
Wbm5074|gene682	220.586	0	#DIV/0!	Predicted membrane metal-binding protein, ComEC/Rec2 family (pseudogene region)
Wbm5075|gene683	70.9588	0	#DIV/0!	Pseudouridylate synthases, 23S RNA-specific (pseudogene region)
Wbm5076|gene691	4858.21	0	#DIV/0!	Phosphatidylglycerophosphatase A (pseudogene region)
Wbm5077|gene696	26.2542	0	#DIV/0!	Uncharacterized conserved protein, homolog of eukaryotic cThy28 (pseudogene region)
Wbm5079|gene728	360.792	0	#DIV/0!	Unchracterized conserved protein (pseudogene region)
Wbm5080|gene764	272.51	0	#DIV/0!	Phage-related protein (pseudogene region)
Wbm5082|gene774	139.865	0	#DIV/0!	Membrane protease subunit, stomatin/prohibitin homolog (pseudogene region)
Wbm5088|gene824	2142.61	0	#DIV/0!	Uncharacterized conserved protein (pseudogene region)
Wbm5090|gene829	21.245	0	#DIV/0!	pseudogene
Wbm5091|gene833	580.068	0	#DIV/0!	Major capsid protein precursor (pseudogene region)
Wbm5093|gene851	2501.32	0	#DIV/0!	Na+/H+-dicarboxylate symporter (pseudogene region)
Wbm7001|rna0	1205.72	0	#DIV/0!	tRNA-Ser
Wbm7002|rna1	28390.4	0	#DIV/0!	tRNA-Ser
Wbm7003|rna2	1185.03	0	#DIV/0!	tRNA-Ala
Wbm7004|rna3	574.449	0	#DIV/0!	tRNA-Cys
Wbm7005|rna4	8267.95	0	#DIV/0!	tRNA-His
Wbm7006|rna5	5464.58	0	#DIV/0!	tRNA-Arg
Wbm7007|rna6	1637.65	0	#DIV/0!	tRNA-Arg
Wbm7009|rna8	3303.14	0	#DIV/0!	tRNA-Leu
Wbm7010|rna9	752.88	0	#DIV/0!	tRNA-Val
Wbm7012|rna11	402.828	0	#DIV/0!	tRNA-Val
Wbm7014|rna13	543.879	0	#DIV/0!	tRNA-Lys
Wbm7020|rna20	423.412	0	#DIV/0!	tRNA-Met
Wbm7021|rna21	3814.76	0	#DIV/0!	tRNA-Ile
Wbm7022|rna22	1808.72	0	#DIV/0!	tRNA-Gly
Wbm7023|rna23	7115.46	0	#DIV/0!	tRNA-Trp
Wbm7024|rna24	199424	0	#DIV/0!	tRNA-Gly
Wbm7025|rna25	266666	0	#DIV/0!	tRNA-Tyr
Wbm7027|rna27	3676.64	0	#DIV/0!	tRNA-Arg
Wbm7028|rna30	440.747	0	#DIV/0!	tRNA-Ile
Wbm7029|rna31	431.577	0	#DIV/0!	tRNA-Glu
Wbm7030|rna32	8604.06	0	#DIV/0!	tRNA-Arg
Wbm7031|rna33	4614.14	0	#DIV/0!	tRNA-Leu
Wbm7033|rna35	23946.6	0	#DIV/0!	tRNA-Phe
ychF|gene186	133.173	0	#DIV/0!	Predicted GTPase, probable translation factor
Average FPKM/transcript	2934.5	632.2	40.3552
